# Supplementary material
Source: MDPI journal article supplement (https://www.mdpi.com/2073-4395/11/6/1106)
Supplement: s1 [file s1]

**Table S1.** List of oligonucleotides used in this study for qRT-PCR analysis.

| Gene name and function                | Gene name abbreviation | Organism              | NCBI Ref. Seq. | Forward (5' ----> 3')   | Reverse (5' ----> 3')   | product length (bp) |
|---------------------------------------|------------------------|-----------------------|----------------|-------------------------|-------------------------|---------------------|
| <i>Phenylalanine ammonia lyase</i>    | <i>PAL</i>             | <i>L. sativa</i>      | AF299330.1     | CGCTTACAGTTTCTCAGGTG    | GCTCTCCATAACCCAATCAC    | 122                 |
| <i>Chalcone synthase</i>              | <i>CHS</i>             | <i>L. sativa</i>      | AB525909.1     | TAACGACACCCACCTTGA      | CAGACACCATCTCGAACAAC    | 112                 |
| <i>Flavonol synthase</i>              | <i>FLS</i>             | <i>L. sativa</i>      | AB359897.1     | CCCAAATGAAGTTCAAGGTCTAC | GCTCAATATCTCCATTTGGTCAC | 112                 |
| <i>4-Coumaric acid 3'-hydroxylase</i> | <i>4C3H</i>            | <i>Coffea arabica</i> | JQ946543.1     | CCGACTTCTCAAACCTCCCA    | GTAACCGCCAACCTTGACAT    | 129                 |
| <i>Dihydroflavonol 4-reductase</i>    | <i>DFR</i>             | <i>L. sativa</i>      | XM023893302.1  | TTGGTGTTTACATCCTCTGC    | GTCCAAATCGCTCCAATGA     | 90                  |
| <i>Catalase</i>                       | <i>CAT</i>             | <i>L. sativa</i>      | XM023874935.1  | CATGCTGAACAGTACCCTATT   | GCAAAGGATCTGTATCTCTCTC  | 113                 |
| <i>Glutathione-S-transferase</i>      | <i>GST</i>             | <i>L. sativa</i>      | XM023891169.1  | CATCGAATCAAGGGCGATTA    | ACTCCACTTCCATCCACA      | 119                 |
| <i>Actin</i>                          | <i>actin</i>           | <i>L. sativa</i>      | AY260165.1     | AGGTGTCATGGTGGCATGGGA   | TGTCTCAGGGGCGACACG      | 106                 |

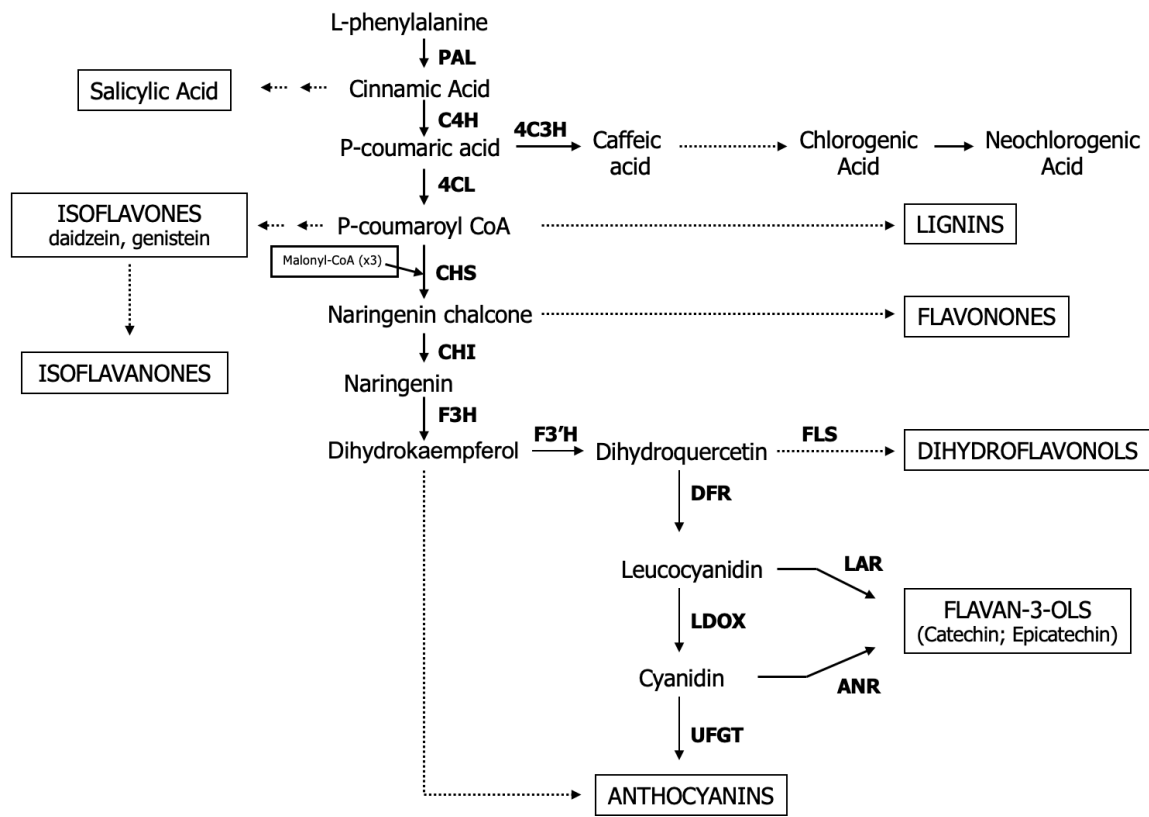

**Figure S1.** Phenylpropanoid biosynthetic pathway involving anthocyanins and flavonoids. In bold the biosynthetic enzymes. PAL, phenylalanine ammonia lyase; C4H, cinnamic acid 4-hydroxylase; 4C3H, 4-coumaric acid 3-hydroxylase; 4CL, 4-coumarate-CoA ligase; CHS, chalcone synthase; CHI, chalcone isomerase; F3H, flavanone 3-hydroxylase; F3'H, flavonoid 3'-hydroxylase; FLS, flavonol synthase; DFR, dihydroflavonol 4-reductase; LAR, leucoanthocyanidin reductase; LDOX, leucoanthocyanidin dioxygenase; ANR, anthocyanidin reductase; UFGT, UDP-glucose flavonoid 3-O-glucosyltransferase.
